# Supplementary material
Source: Research Square preprint supplement (doi:10.21203/rs.3.rs-9569382/v1)
Supplement: Supplementary file 2 [file c96de923efab5168e59a42c6.docx]

**Tables**

**Table 1. Cross-reactivity of the high-sensitivity BDNF ELISA with related neurotrophins.**

Recombinant neurotrophins including NGFβ, NT-3, NT-4, and proBDNF from both human and mouse were tested under identical assay conditions. Relative reactivity was calculated as a percentage of the signal obtained for mature BDNF. Values below the limit of detection (0.116 pg/mL) are indicated as <0.116. NGFβ, NT-3, and NT-4 showed no detectable signals, indicating negligible cross-reactivity. In contrast, proBDNF exhibited minimal reactivity (<2%), demonstrating that the assay preferentially detects mature BDNF. All recombinant proteins were tested at comparable concentrations under identical assay conditions.
